# Supplementary material for: Association of Klotho Protein Levels and KL-VS Heterozygosity With Alzheimer Disease and Amyloid and Tau Burden
Source: PubMed Central journal article supplement (PMC9682425; doi:10.1001/jamanetworkopen.2022.43232), 2022-11-22
Supplement: jamanetwopen-e2243232-s001.pdf [file jamanetwopen-e2243232-s001.pdf]

## Supplementary Online Content

Grøntvedt GR, Sando SB, Lauridsen C, et al. Association of Klotho protein levels and *KL-VS* heterozygosity with Alzheimer disease and amyloid and tau burden.

*JAMA Netw Open.* 2022;5(11):e2243232.

doi:10.1001/jamanetworkopen.2022.43232

**eFigure 1.** CSF Klotho by *KL-VS* Heterozygosity in the Clinical Groups

**eFigure 2.** Correlation Between CSF and Plasma Levels of Klotho

**eFigure 3.** Scatterplot of Plasma Klotho and Age in the Clinical Groups

**eTable 1.** Associations Between CSF Klotho and Core CSF AD Biomarkers in Clinical Groups

**eTable 2.** Associations Between CSF Klotho and AD Core CSF Biomarkers in Subgroups Based on *APOE4+* and *KL-VS<sup>HET+</sup>* Status

**eTable 3.** Associations Between Plasma Klotho and Core CSF AD Biomarkers

This supplementary material has been provided by the authors to give readers additional information about their work.

**eFigure 1.** CSF Klotho by KL-VS Heterozygosity in the Clinical Groups<sup>a</sup>

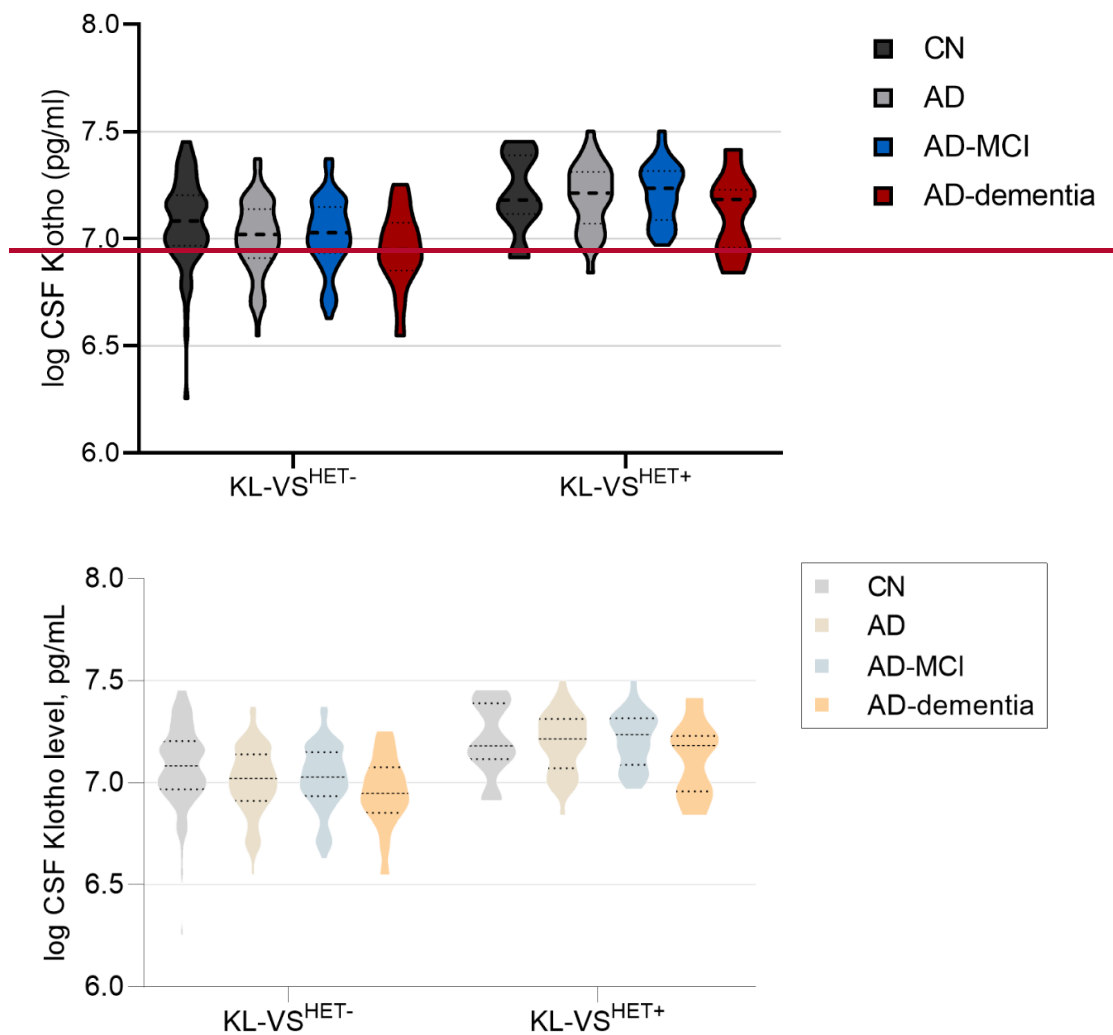

Abbreviations: AD-MCI, mild cognitive impairment due to Alzheimer’s disease. AD-dementia, dementia due to Alzheimer’s disease. CN, healthy controls. AD group, Alzheimer’s disease group. KL-VS, haplotype consisting of two missense variants in the *Klotho* gene. KL-VS HET+, heterozygosity for KL-VS. KL-VS HET-, no heterozygosity for KL-VS. CSF, cerebrospinal fluid.

<sup>a</sup> This violin plot shows the concentrations of Klotho in CSF (pg/mL) based on KL-VS HET+ status in different clinical groups.

**eFigure 2.** Correlation Between CSF and Plasma Levels of Klotho<sup>a</sup>

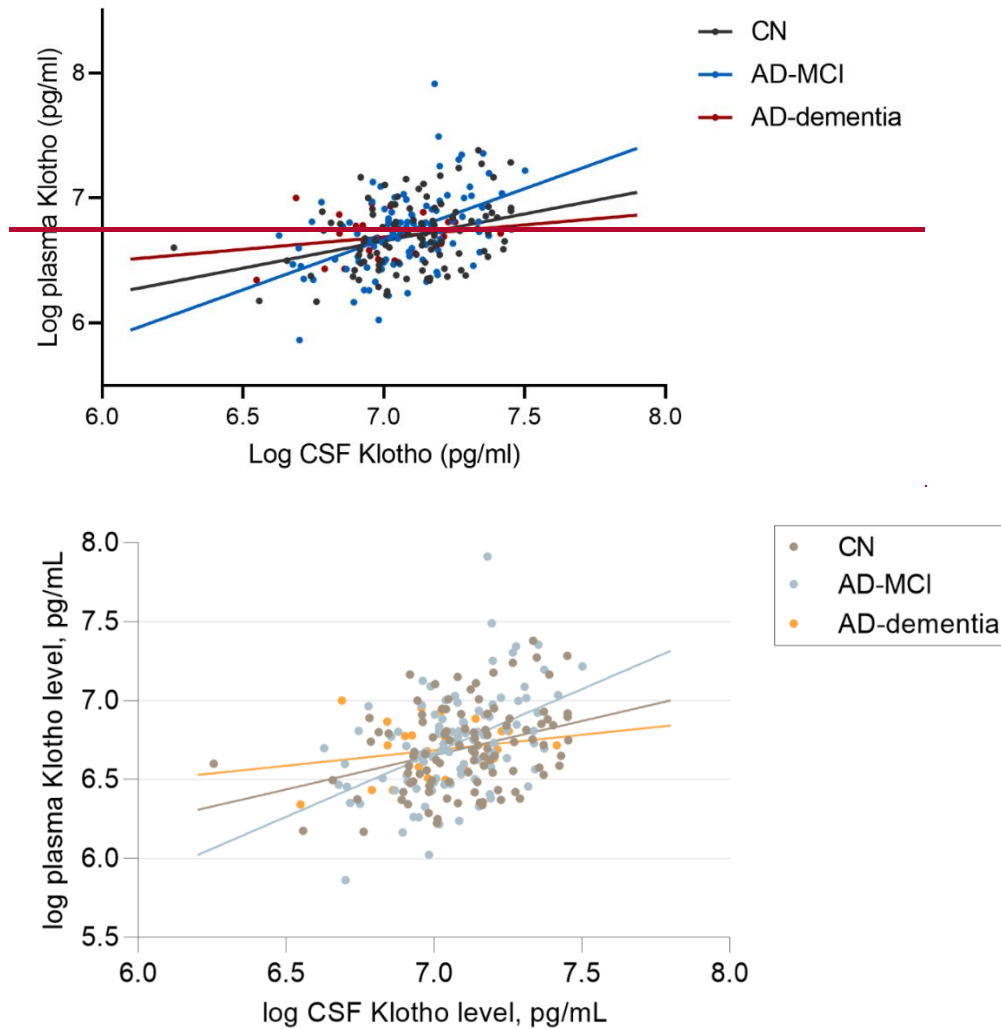

Abbreviations: AD-MCI, mild cognitive impairment due to Alzheimer’s disease. AD-dementia, dementia due to Alzheimer’s disease. CN, healthy controls. CSF, cerebrospinal fluid.

<sup>a</sup>This scatterplot shows the correlation between Klotho in CSF (pg/mL) and Klotho in plasma (pg/mL) in clinical groups measured by commercially available Human soluble  $\alpha$ -Klotho Assay ELISA kit.

**eFigure 3.** Scatterplot of Plasma Klotho and Age in the Clinical Groups<sup>a</sup>

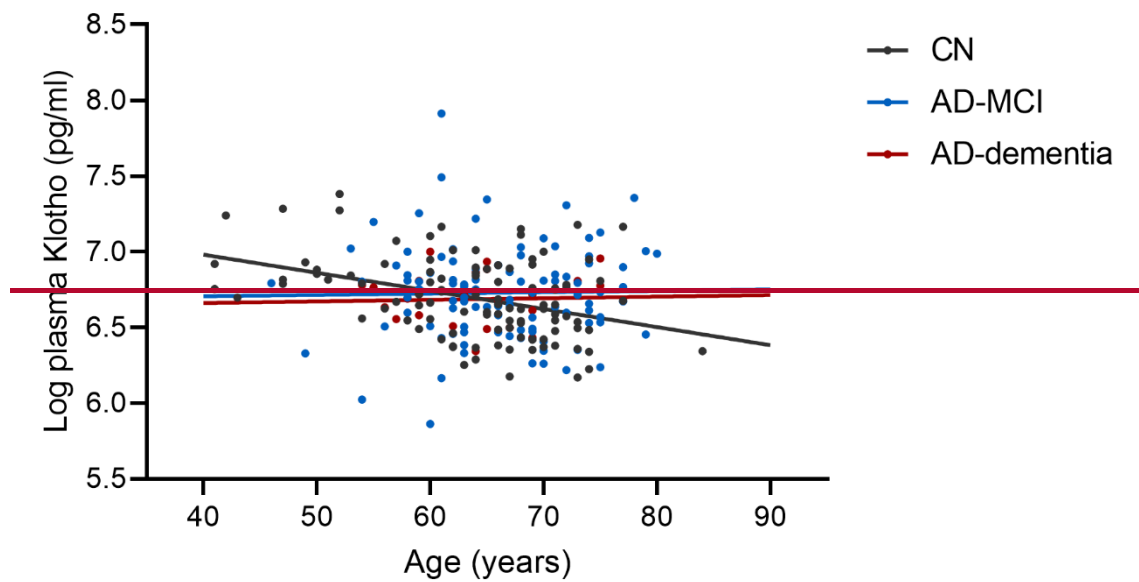

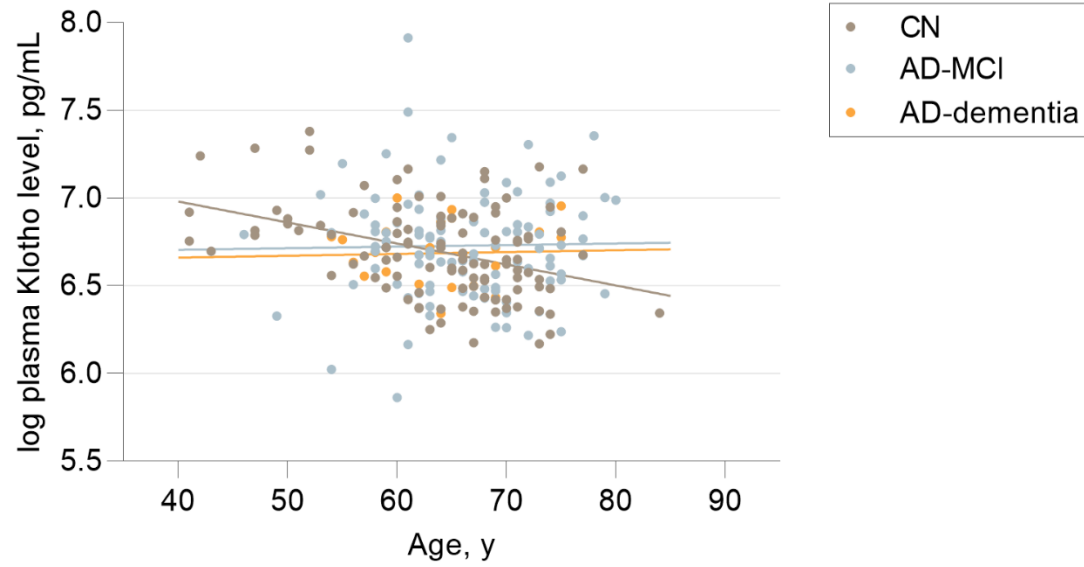

Abbreviations: AD-MCI, mild cognitive impairment due to Alzheimer’s disease. AD-dementia, dementia due to Alzheimer’s disease. CN, healthy controls.  
<sup>a</sup> This scatterplot shows logarithmic transformed concentrations values of Klotho in plasma and age in different clinical groups.

**eTable 1.** Associations Between CSF Klotho and Core CSF AD Biomarkers in Clinical Groups<sup>d</sup>

|                              |    | <b>Beta coefficient</b> | <b>95% confidence interval</b> |
|------------------------------|----|-------------------------|--------------------------------|
| <b>CSF Aβ42<sup>a</sup></b>  | CN | 0.104                   | -0.139 – 0.347                 |
|                              | AD | 0.099                   | -0.142 – 0.341                 |
| <b>CSF T-tau<sup>b</sup></b> | CN | -0.360                  | -0.871 – 0.151                 |
|                              | AD | -0.723                  | -1.295 – -0.152                |
| <b>CSF P-tau<sup>c</sup></b> | CN | -0.233                  | -0.644 – 0.178                 |
|                              | AD | -0.556                  | -1.014 – -0.099                |

Abbreviations: CN=control group. AD group= Alzheimer’s disease group. CSF=cerebrospinal fluid. Aβ42=amyloid beta 42. T-tau= total tau. P-tau= phosphorylated tau.

<sup>a</sup> No significant difference between clinical groups, p=0.260

<sup>b</sup> No significant difference between clinical groups, p=0.399

<sup>c</sup> No significant difference between clinical groups, p=0.349

<sup>d</sup>This table shows the associations between CSF klotho and CSF using univariable linear regression.

**eTable 2.** Associations Between CSF Klotho and AD Core CSF Biomarkers in Subgroups Based on *APOE4+* and *KL-VS<sup>HET+</sup>* Status<sup>9</sup>

| Subgroup                                 | CSF A $\beta$ 42 |                  |                             | CSF T-tau        |                             |                  | CSF P-tau                   |  |
|------------------------------------------|------------------|------------------|-----------------------------|------------------|-----------------------------|------------------|-----------------------------|--|
|                                          | N                | Beta Coefficient | 95%CI                       | Beta Coefficient | 95%CI                       | Beta Coefficient | 95%CI                       |  |
| <b>CN and <i>APOE4-</i></b>              | 37               | 0.091            | -0.224 - 0.407 <sup>a</sup> | -0.554           | -0.318 - 0.211 <sup>b</sup> | -0.385           | -1.036 - 0.265 <sup>c</sup> |  |
| <b>CN and <i>APOE4+</i></b>              | 24               | 0.078            | -0.338 - 0.794              | -0.169           | -0.950 - 0.613              | -0.061           | -0.651 - 0.530              |  |
| <b>AD and <i>APOE4-</i></b>              | 27               | -0.243           | -0.594 - 0.108              | -0.865           | -2.394 - 0.663              | -0.062           | -0.213 - 1.090              |  |
| <b>AD and <i>APOE4+</i></b>              | 97               | 0.228            | -0.065 - 0.521              | -0.700           | -1.284 - -0.116             | -0.748           | -1.236 - -0.260             |  |
| <b>CN and <i>KLVS<sup>HET-</sup></i></b> | 50               | 0.100            | -0.155 - 0.355 <sup>d</sup> | -0.448           | -0.024 - 0.128 <sup>e</sup> | -0.337           | -0.787 - 0.113 <sup>f</sup> |  |
| <b>CN and <i>KLVS<sup>HET+</sup></i></b> | 13               | 0.497            | -0.247 - 1.241              | -0.302           | -1.780 - 1.176              | -0.015           | -1.287 - 1.267              |  |
| <b>AD and <i>KLVS<sup>HET-</sup></i></b> | 90               | 0.090            | -0.232 - 0.412              | -0.811           | -1.515 - -0.108             | -0.695           | -1.279 - -0.110             |  |
| <b>AD and <i>KLVS<sup>HET+</sup></i></b> | 36               | 0.308            | -0.235 - 0.850              | -0.178           | -1.722 - 1.366              | -0.512           | -1.652 - 0.628              |  |

Abbreviations: CN= control group. AD= Alzheimer's disease group. *APOE4+*= Apolipoprotein E4 carrier. *APOE4-*= Apolipoprotein E4 non-carrier. *KLVS<sup>HET+</sup>* = Heterozygosity for KL-VS. *KLVS<sup>HET-</sup>*= no heterozygosity for KL-VS. A $\beta$ 42=amyloid beta 42. T-tau= total tau. P-tau= phosphorylated tau.

<sup>a</sup> No significant differences between subgroups, p=0.337

<sup>b</sup> No significant differences between subgroups, p=0.706

<sup>c</sup> No significant differences between subgroups, p=0.297

<sup>d</sup> No significant differences between subgroups, p=0.683

<sup>e</sup> No significant differences between subgroups, p=0.774

<sup>f</sup> No significant differences between subgroups, p=0.694

<sup>9</sup>This table shows the associations between CSF Klotho and core CSF AD biomarkers in subgroups based on *APOE4+* and *KL-VS<sup>HET+</sup>* status using univariable linear regression.

**eTable 3.** Associations Between Plasma Klotho and Core CSF AD Biomarkers<sup>a</sup>

**Entire cohort**

|                            |                           |                        |
|----------------------------|---------------------------|------------------------|
| CSF A $\beta$ 42: p=0.133. | Beta coefficient = 0.176  | 95%CI -0.054 - -0.406  |
| CSF T-tau: p=0.015,        | Beta coefficient = -0.398 | 95%CI -0.719 - -0.077  |
| CSF P-tau: p=0.042,        | Beta coefficient = -0.268 | 95%CI -0.526 - -0.010. |

**No difference in this association between the CN group and the AD group:**

|                          |                   |                   |
|--------------------------|-------------------|-------------------|
| CSF A $\beta$ 42 p=0.523 | CSF T-tau p=0.427 | CSF P-tau p=0.503 |
|--------------------------|-------------------|-------------------|

**No difference in this association between the CN group and the AD group based on KL-VS<sup>HET+</sup> status:**

|                          |                    |                   |
|--------------------------|--------------------|-------------------|
| CSF A $\beta$ 42 p=0.813 | CSF T-tau, p=0.840 | CSF P-tau p=0.907 |
|--------------------------|--------------------|-------------------|

**No difference in this association between the CN group and the AD group based on APOE4+ status:**

|                          |                  |                   |
|--------------------------|------------------|-------------------|
| CSF A $\beta$ 42 p=0.730 | CSF T-taup=0.518 | CSF P-tau p=0.480 |
|--------------------------|------------------|-------------------|

Abbreviations: CN= control group. AD= Alzheimer's disease group. APOE4+= Apolipoprotein E4 carrier. KLVS<sup>HET+</sup> = Heterozygosity for KL-VS. A $\beta$ 42=amyloid beta 42. T-tau= total tau. P-tau= phosphorylated tau.

<sup>a</sup>This Table shows the associations between plasma Klotho and core CSF AD biomarkers in the entire cohort and further stratified by clinical groups, APOE4+ - and KL-VS<sup>HET+</sup> status using univariable linear regression.
